# Supplementary material
Source: bioRxiv or medRxiv preprint supplement (https://www.biorxiv.org/highwire/filestream/100241/field_highwire_adjunct_files/2/306266-3.pdf)

Supplementary Fig 3.

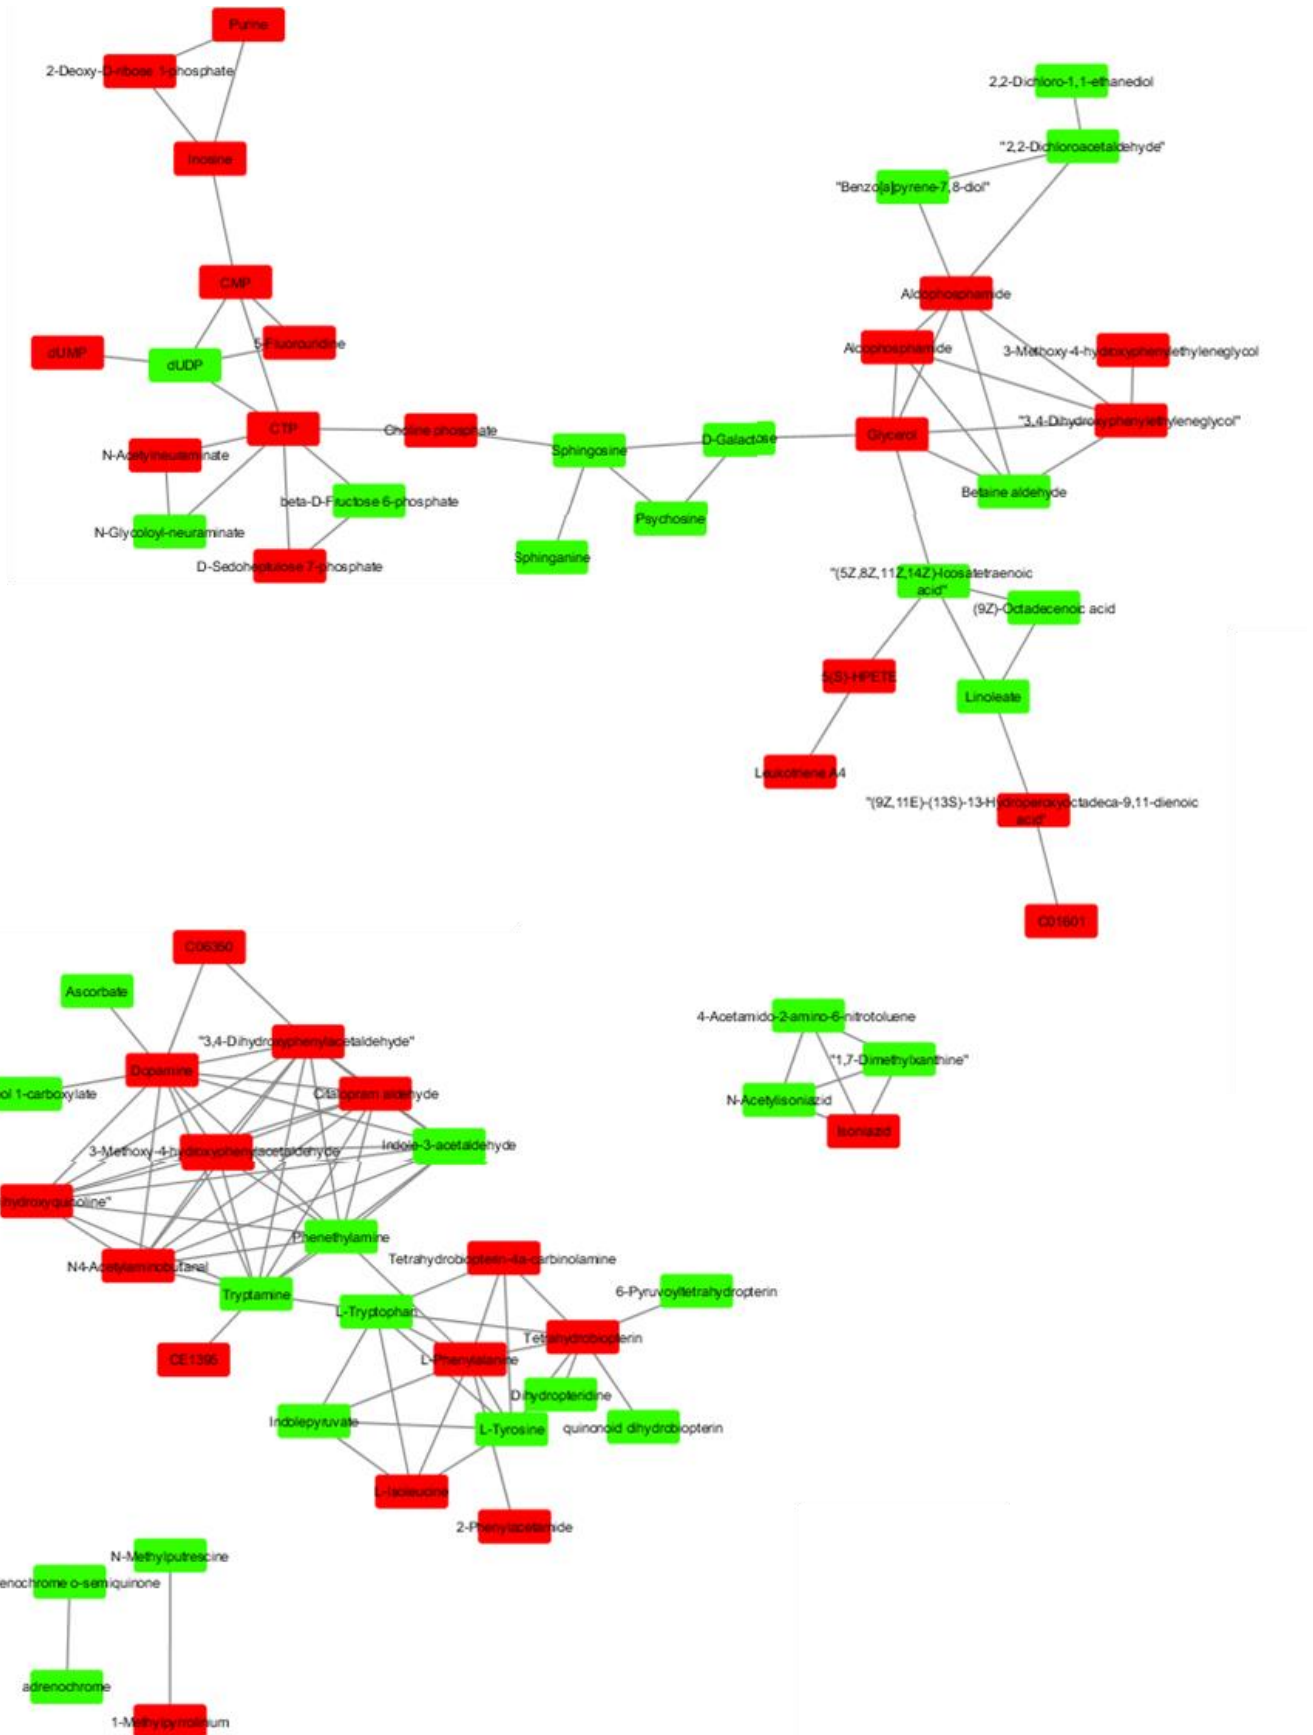

Supplement: Supplementary file [file 306266-3.pdf]
